# Supplementary material for: Last ice sheet recession and landscape emergence above sea level in east-central Sweden, evaluated using in situ cosmogenic 14 C from quartz
Source: Copernicus journal article supplement (doi:10.5194/gchron-6-291-2024), 2024-07-01
Supplement: Supplementary file 1 [file gchron-6-291-2024-supplement.zip]

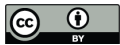

## *Supplement of*

# **Last ice sheet recession and landscape emergence above sea level in east-central Sweden, evaluated using in situ cosmogenic $^{14}\text{C}$ from quartz**

**Bradley W. Goodfellow et al.**

*Correspondence to:* Bradley W. Goodfellow ([bradley.goodfellow@sgu.se](mailto:bradley.goodfellow@sgu.se))

- [gchron-6-291-2024-supplement-title-page.pdf](#)
- [Supplement 1\\_Sample sites photos and petrology.xlsx](#)
- [Supplement 2  \$^{14}\text{C}\$  data.xlsx](#)
- [Supplement 3 Cosmogenic nuclide calculation code.zip](#)

The copyright of individual parts of the supplement might differ from the article licence.
